# Supplementary material
Source: bioRxiv or medRxiv preprint supplement (https://medrxiv.org/highwire/filestream/84887/field_highwire_adjunct_files/0/2020.06.03.20120261-1.pdf)
Supplement: Supplementary file [file 2020.06.03.20120261-1.pdf]

## SUPPLEMENTARY DATA

### Association Between ACEIs or ARBs Use and Clinical Outcomes in COVID-19 Patients: A Systematic Review and Meta-analysis

Carlos Diaz-Arocutipa, MD; Jose Saucedo-Chinchay, MD; Adrian V. Hernandez, MD, PhD

**eTable 1. MOOSE Checklist for Meta-analyses of Observational Studies**

| Item No.                                    | Recommendation                                                                                             | Item reported? | Reported on Page No. |
|---------------------------------------------|------------------------------------------------------------------------------------------------------------|----------------|----------------------|
| Reporting of background should include      |                                                                                                            |                |                      |
| 1                                           | Problem definition                                                                                         | Yes            | 5                    |
| 2                                           | Hypothesis statement                                                                                       | Yes            | 5                    |
| 3                                           | Description of study outcome(s)                                                                            | Yes            | 7                    |
| 4                                           | Type of exposure or intervention used                                                                      | Yes            | 6                    |
| 5                                           | Type of study designs used                                                                                 | Yes            | 6                    |
| 6                                           | Study population                                                                                           | Yes            | 6                    |
| Reporting of search strategy should include |                                                                                                            |                |                      |
| 7                                           | Qualifications of searchers (eg, librarians and investigators)                                             | Yes            | 6                    |
| 8                                           | Search strategy, including time period included in the synthesis and key words                             | Yes            | 6                    |
| 9                                           | Effort to include all available studies, including contact with authors                                    | Yes            | 6                    |
| 10                                          | Databases and registries searched                                                                          | Yes            | 6                    |
| 11                                          | Search software used, name and version, including special features used (eg, explosion)                    | Yes            | 6                    |
| 12                                          | Use of hand searching (eg, reference lists of obtained articles)                                           | Yes            | 6                    |
| 13                                          | List of citations located and those excluded, including justification                                      | No             | -                    |
| 14                                          | Method of addressing articles published in languages other than English                                    | Yes            | 6                    |
| 15                                          | Method of handling abstracts and unpublished studies                                                       | Yes            | 6                    |
| 16                                          | Description of any contact with authors                                                                    | Yes            | 8                    |
| Reporting of methods should include         |                                                                                                            |                |                      |
| 17                                          | Description of relevance or appropriateness of studies assembled for assessing the hypothesis to be tested | Yes            | 6                    |

|                                         |                                                                                                                                                                                                                                                                              |     |    |
|-----------------------------------------|------------------------------------------------------------------------------------------------------------------------------------------------------------------------------------------------------------------------------------------------------------------------------|-----|----|
| 18                                      | Rationale for the selection and coding of data (eg, sound clinical principles or convenience)                                                                                                                                                                                | Yes | 6  |
| 19                                      | Documentation of how data were classified and coded (eg, multiple raters, blinding and interrater reliability)                                                                                                                                                               | Yes | 6  |
| 20                                      | Assessment of confounding (eg, comparability of cases and controls in studies where appropriate)                                                                                                                                                                             | Yes | 7  |
| 21                                      | Assessment of study quality, including blinding of quality assessors, stratification or regression on possible predictors of study results                                                                                                                                   | Yes | 7  |
| 22                                      | Assessment of heterogeneity                                                                                                                                                                                                                                                  | Yes | 8  |
| 23                                      | Description of statistical methods (eg, complete description of fixed or random effects models, justification of whether the chosen models account for predictors of study results, dose-response models, or cumulative meta-analysis) in sufficient detail to be replicated | Yes | 8  |
| 24                                      | Provision of appropriate tables and graphics                                                                                                                                                                                                                                 | Yes | 29 |
| Reporting of results should include     |                                                                                                                                                                                                                                                                              |     |    |
| 25                                      | Graphic summarizing individual study estimates and overall estimate                                                                                                                                                                                                          | Yes | 30 |
| 26                                      | Table giving descriptive information for each study included                                                                                                                                                                                                                 | Yes | 32 |
| 27                                      | Results of sensitivity testing (eg, subgroup analysis)                                                                                                                                                                                                                       | Yes | 13 |
| 28                                      | Indication of statistical uncertainty of findings                                                                                                                                                                                                                            | Yes | 8  |
| Reporting of discussion should include  |                                                                                                                                                                                                                                                                              |     |    |
| 29                                      | Quantitative assessment of bias (eg, publication bias)                                                                                                                                                                                                                       | Yes | 10 |
| 30                                      | Justification for exclusion (eg, exclusion of non-English language citations)                                                                                                                                                                                                | Yes | 6  |
| 31                                      | Assessment of quality of included studies                                                                                                                                                                                                                                    | Yes | 9  |
| Reporting of conclusions should include |                                                                                                                                                                                                                                                                              |     |    |
| 32                                      | Consideration of alternative explanations for observed results                                                                                                                                                                                                               | Yes | 14 |
| 33                                      | Generalization of the conclusions (ie, appropriate for the data presented and within the domain of the literature review)                                                                                                                                                    | Yes | 14 |
| 34                                      | Guidelines for future research                                                                                                                                                                                                                                               | Yes | 17 |
| 35                                      | Disclosure of funding source                                                                                                                                                                                                                                                 | Yes | 18 |

**eTable 2. Electronic search strategy**

|                                                                                                                                                                                                                                                                                                                                                                                                                                                                                                                                                                                                                                                                                                                                                                                                                                                                                                                                                                                                                                                                                                                                                                                                                                                                                                                                                                                                                                                                                                                                                                                                                                                                                                                                                                                                                                                                                                                                                                                                                                                                                                                                                                                                                                             |
|---------------------------------------------------------------------------------------------------------------------------------------------------------------------------------------------------------------------------------------------------------------------------------------------------------------------------------------------------------------------------------------------------------------------------------------------------------------------------------------------------------------------------------------------------------------------------------------------------------------------------------------------------------------------------------------------------------------------------------------------------------------------------------------------------------------------------------------------------------------------------------------------------------------------------------------------------------------------------------------------------------------------------------------------------------------------------------------------------------------------------------------------------------------------------------------------------------------------------------------------------------------------------------------------------------------------------------------------------------------------------------------------------------------------------------------------------------------------------------------------------------------------------------------------------------------------------------------------------------------------------------------------------------------------------------------------------------------------------------------------------------------------------------------------------------------------------------------------------------------------------------------------------------------------------------------------------------------------------------------------------------------------------------------------------------------------------------------------------------------------------------------------------------------------------------------------------------------------------------------------|
| <p><b>PubMed</b></p> <p>1. "COVID-19"[Supplementary Concept] OR "severe acute respiratory syndrome coronavirus 2"[Supplementary Concept] OR "2019-ncov"[tiab] OR covid19[tiab] OR "covid 19"[tiab] OR "novel coronavirus"[tiab] OR "novel coronaviruses"[tiab] OR "novel corona virus"[tiab] OR "sars-cov2"[tiab] OR "ncov-2019"[tiab] OR "sars coronavirus 2"[tiab] OR "sars-cov-2"[tiab] OR ((coronavirus[tiab] OR coronaviruses[tiab] OR "corona virus"[tiab] OR "corona viruses"[tiab] OR cov[tiab] OR ncov[tiab] OR "coronavirus"[Mesh] OR "coronavirus infections"[Mesh]) AND (outbreak[tiab] OR wuhan[All fields] OR new[All fields])) OR ((coronavirus[tiab] OR coronaviruses[tiab] OR "corona virus"[tiab] OR "corona viruses"[tiab]) AND 2019[tiab])</p> <p>2. benazepril[tiab] OR captopril[tiab] OR cilazapril[tiab] OR enalapril[tiab] OR fosinopril[tiab] OR imidapril[tiab] OR lisinopril[tiab] OR moexipril[tiab] OR perindopril[tiab] OR quinapril[tiab] OR ramipril[tiab] OR trandolapril[tiab] OR "angiotensin-converting enzyme inhibitor"[tiab] OR "angiotensin-converting enzyme inhibitors"[tiab] OR "angiotensin-converting enzyme inhibitors"[Mesh] OR "ACE inhibitor"[tiab] OR "ACE inhibitors"[tiab] OR ACEI[tiab] OR ACEIs[tiab] OR azilsartan[tiab] OR candesartan[tiab] OR eprosartan[tiab] OR irbesartan[tiab] OR losartan[tiab] OR olmesartan[tiab] OR telmisartan[tiab] OR valsartan[tiab] OR "angiotensin receptor blockade"[tiab] OR "angiotensin receptor blocker"[tiab] OR "angiotensin receptor blockers"[tiab] OR "angiotensin receptor antagonist"[tiab] OR "angiotensin receptor antagonists"[tiab] OR "angiotensin II receptor blocker"[tiab] OR "angiotensin II receptor blockers"[tiab] OR "angiotensin II type 1 receptor blocker"[tiab] OR "angiotensin II type 1 receptor blockers"[tiab] OR "angiotensin receptor antagonists"[Mesh] OR ARB[tiab] OR ARBs[tiab] OR ACEI/ARB[tiab] OR ACEI/ARBs[tiab] OR ACEIs/ARBs[tiab] OR "RAS inhibitor"[tiab] OR "RAS inhibitors"[tiab] OR "renin-angiotensin system blocker"[tiab] OR "renin-angiotensin system blockers"[tiab] OR "renin-angiotensin system antagonist"[tiab] OR "renin-angiotensin system antagonists"[tiab]</p> <p>3. #1 AND #2</p> |
| <p><b>EMBASE</b></p> <p>1. ('2019-ncov' OR 'covid19' OR 'covid 19'/exp OR 'covid 19' OR 'novel coronavirus' OR 'novel coronaviruses' OR 'novel corona virus' OR 'sars-cov2' OR 'sars-cov-2' OR 'new coronaviruses' OR 'ncov-2019' OR 'sars coronavirus 2'/exp OR 'sars coronavirus 2' OR ((coronavirus/exp OR 'coronavirus' OR 'coronaviruses' OR 'corona virus'/exp OR 'corona virus' OR 'corona viruses' OR 'cov' OR 'ncov') AND ('outbreak'/exp OR 'outbreak' OR 'wuhan' OR 'new')) OR (('coronavirus'/exp OR 'coronavirus' OR 'coronaviruses' OR 'corona virus'/exp OR 'corona virus' OR 'corona viruses') AND '2019'))</p> <p>2. 'benazepril'/exp OR 'captopril'/exp OR 'cilazapril'/exp OR 'enalapril'/exp OR 'fosinopril'/exp OR 'imidapril'/exp OR 'lisinopril'/exp OR 'moexipril'/exp OR 'perindopril'/exp OR 'quinapril'/exp OR 'ramipril'/exp OR 'trandolapril'/exp OR 'angiotensin-converting enzyme inhibitor'/exp OR 'angiotensin-converting enzyme inhibitors'/exp OR 'ACE inhibitor'/exp OR 'ACE inhibitors' OR 'ACEI' OR 'ACEIs' OR 'azilsartan'/exp OR 'candesartan'/exp OR 'eprosartan'/exp OR 'irbesartan'/exp OR 'losartan'/exp OR 'olmesartan'/exp OR 'telmisartan'/exp OR 'valsartan'/exp OR 'angiotensin receptor blockade' OR 'angiotensin receptor blocker'/exp OR 'angiotensin receptor blockers'/exp OR 'angiotensin receptor antagonist'/exp OR 'angiotensin receptor antagonists'/exp OR 'angiotensin II receptor blocker'/exp OR 'angiotensin II receptor blockers'/exp OR 'angiotensin II type 1 receptor blocker'/exp OR 'angiotensin II type 1 receptor blockers'/exp OR 'ARB' OR 'ARBs' OR 'ACEI/ARB' OR 'ACEI/ARBs' OR 'ACEIs/ARBs' OR 'RAS inhibitor' OR 'RAS inhibitors' OR 'renin-angiotensin system blocker' OR 'renin-angiotensin system blockers' OR 'renin-angiotensin system antagonist' OR 'renin-angiotensin system antagonists'</p> <p>3. #1 AND #2</p>                                                                                                                                                                                                                                                                                                                                      |
| <p><b>Scopus</b></p> <p>1. TITLE-ABS-KEY ("2019-ncov" OR covid19 OR "covid 19" OR "novel coronavirus" OR "novel coronaviruses" OR "novel corona virus" OR "sars-cov2" OR "ncov-2019" OR "sars coronavirus 2" OR "sars-cov-2" OR ((coronavirus OR coronaviruses OR "corona virus" OR "corona viruses" OR cov OR ncov) AND (outbreak OR wuhan OR new)) OR ((coronavirus OR coronaviruses OR "corona virus" OR "corona viruses") AND 2019))</p> <p>2. TITLE-ABS-KEY (benazepril OR captopril OR cilazapril OR enalapril OR fosinopril OR imidapril</p>                                                                                                                                                                                                                                                                                                                                                                                                                                                                                                                                                                                                                                                                                                                                                                                                                                                                                                                                                                                                                                                                                                                                                                                                                                                                                                                                                                                                                                                                                                                                                                                                                                                                                         |

OR lisinopril OR moexipril OR perindopril OR quinapril OR ramipril OR trandolapril OR "angiotensin-converting enzyme inhibitor" OR "angiotensin-converting enzyme inhibitors" OR "ACE inhibitor" OR "ACE inhibitors" OR ACEI OR ACEIs OR azilsartan OR candesartan OR eprosartan OR irbesartan OR losartan OR olmesartan OR telmisartan OR valsartan OR "angiotensin receptor blockade" OR "angiotensin receptor blocker" OR "angiotensin receptor blockers" OR "angiotensin receptor antagonist" OR "angiotensin receptor antagonists" OR "angiotensin II receptor blocker" OR "angiotensin II receptor blockers" OR "angiotensin II type 1 receptor blocker" OR "angiotensin II type 1 receptor blockers" OR ARB OR ARBs OR ACEI/ARB OR ACEI/ARBs OR ACEIs/ARBs OR "RAS inhibitor" OR "RAS inhibitors" OR "renin-angiotensin system blocker" OR "renin-angiotensin system blockers" OR "renin-angiotensin system antagonist" OR "renin-angiotensin system antagonists")

3. #1 AND #2

#### **Web of Science**

1. ALL=("2019-ncov" OR covid19 OR "covid 19" OR "novel coronavirus" OR "novel coronaviruses" OR "novel corona virus" OR "sars-cov2" OR "ncov-2019" OR "sars coronavirus 2" OR "sars-cov-2" OR ((coronavirus OR coronaviruses OR "corona virus" OR "corona viruses" OR cov OR ncov) AND (outbreak OR wuhan OR new)) OR ((coronavirus OR coronaviruses OR "corona virus" OR "corona viruses") AND 2019))

2. ALL=(benazepril OR captopril OR cilazapril OR enalapril OR fosinopril OR imidapril OR lisinopril OR moexipril OR perindopril OR quinapril OR ramipril OR trandolapril OR "angiotensin-converting enzyme inhibitor" OR "angiotensin-converting enzyme inhibitors" OR "ACE inhibitor" OR "ACE inhibitors" OR ACEI OR ACEIs OR azilsartan OR candesartan OR eprosartan OR irbesartan OR losartan OR olmesartan OR telmisartan OR valsartan OR "angiotensin receptor blockade" OR "angiotensin receptor blocker" OR "angiotensin receptor blockers" OR "angiotensin receptor antagonist" OR "angiotensin receptor antagonists" OR "angiotensin II receptor blocker" OR "angiotensin II receptor blockers" OR "angiotensin II type 1 receptor blocker" OR "angiotensin II type 1 receptor blockers" OR ARB OR ARBs OR "RAS inhibitor" OR "RAS inhibitors" OR "renin-angiotensin system blocker" OR "renin-angiotensin system blockers" OR "renin-angiotensin system antagonist" OR "renin-angiotensin system antagonists")

3. #1 AND #2

#### **CENTRAL**

1. ("2019-ncov" OR covid19 OR "covid 19" OR "novel coronavirus" OR "novel coronaviruses" OR "novel corona virus" OR "sars-cov2" OR "ncov-2019" OR "sars coronavirus 2" OR "sars-cov-2" OR ((coronavirus OR coronaviruses OR "corona virus" OR "corona viruses" OR cov OR ncov) AND (outbreak OR wuhan OR new)) OR ((coronavirus OR coronaviruses OR "corona virus" OR "corona viruses") AND 2019)):ti,ab,kw

2. (benazepril OR captopril OR cilazapril OR enalapril OR fosinopril OR imidapril OR lisinopril OR moexipril OR perindopril OR quinapril OR ramipril OR trandolapril OR "angiotensin-converting enzyme inhibitor" OR "angiotensin-converting enzyme inhibitors" OR "ACE inhibitor" OR "ACE inhibitors" OR ACEI OR ACEIs OR azilsartan OR candesartan OR eprosartan OR irbesartan OR losartan OR olmesartan OR telmisartan OR valsartan OR "angiotensin receptor blockade" OR "angiotensin receptor blocker" OR "angiotensin receptor blockers" OR "angiotensin receptor antagonist" OR "angiotensin receptor antagonists" OR "angiotensin II receptor blocker" OR "angiotensin II receptor blockers" OR "angiotensin II type 1 receptor blocker" OR "angiotensin II type 1 receptor blockers" OR ARB OR ARBs OR "RAS inhibitor" OR "RAS inhibitors" OR "renin-angiotensin system blocker" OR "renin-angiotensin system blockers" OR "renin-angiotensin system antagonist" OR "renin-angiotensin system antagonists"):ti,ab,kw

3. #1 AND #2

**eTable 3. Trials registered in clinicaltrials.gov that evaluated the effect of ACEIs and ARBs on COVID-19 patients**

| Identifier  | Study title                                                                                                                              | Experimental arm                         | Control arm                          | Country   | Status                  | Estimated study completion date |
|-------------|------------------------------------------------------------------------------------------------------------------------------------------|------------------------------------------|--------------------------------------|-----------|-------------------------|---------------------------------|
| NCT04329195 | ACE Inhibitors or ARBs Discontinuation in Context of SARS-CoV-2 Pandemic (ACORES-2)                                                      | Discontinuation of RAS blockers          | Continuation of RAS blockers         | France    | Recruiting              | May, 2020                       |
| NCT04355429 | Efficacy of captopril in COVID-19 patients with severe acute respiratory syndrome (SARS) CoV-2 Pneumonia (CAPTOCOVID)                    | Standard of care plus captopril          | Standard of care                     | France    | Not yet recruiting      | August, 2020                    |
| NCT04335123 | Study of open label losartan in COVID-19                                                                                                 | Losartan                                 | None                                 | USA       | Recruiting              | October, 2020                   |
| NCT04340557 | Do angiotensin receptor blockers mitigate progression to acute respiratory distress syndrome with SARS-CoV-2 infection                   | Standard of care plus an ARB             | Standard of care                     | USA       | Recruiting              | December, 2020                  |
| NCT04351581 | Effects of discontinuing renin-angiotensin system inhibitors in patients with COVID-19 (RASCOVID-19)                                     | Continuation of ACEIs/ARBs               | Discontinuation of ACEIs/ARBs        | Denmark   | Recruiting              | December, 2020                  |
| NCT04338009 | Elimination or prolongation of ACE inhibitors and ARB in Coronavirus Disease 2019 (REPLACECOVID)                                         | Discontinuation of ACEIs/ARBs            | Continuation of ACEIs/ARBs           | USA       | Enrolling by invitation | December, 2020                  |
| NCT04345406 | Angiotensin converting enzyme inhibitors in treatment of COVID-19                                                                        | ACEIs (enalapril or captopril)           | Chloroquine                          | Egypt     | Not yet recruiting      | December, 2020                  |
| NCT04364893 | Angiotensin receptor blockers and angiotensin-converting enzyme inhibitors and adverse outcomes in patients with COVID-19 (BRACE-CORONA) | Maintenance of ARBs and ACEIs            | Suspension of ARBs and ACEIs         | Brazil    | Not yet recruiting      | December, 2020                  |
| NCT04394117 | Controlled evaluation of angiotensin receptor blockers for COVID-19 respiratory disease (CLARITY)                                        | Standard of care plus ARBs               | Standard of care                     | Australia | Not yet recruiting      | January, 2020                   |
| NCT04330300 | Coronavirus (COVID-19) ACEI/ARB investigation (CORONACION)                                                                               | Alternative anti-hypertensive medication | Continue ACEIs/ARBs antihypertensive | Ireland   | Recruiting              | March, 2021                     |
| NCT04312009 | Losartan for patients with COVID-19 requiring hospitalization                                                                            | Losartan                                 | Placebo                              | USA       | Recruiting              | April, 2021                     |

|             |                                                                                                                                       |                                   |                  |                   |                    |              |
|-------------|---------------------------------------------------------------------------------------------------------------------------------------|-----------------------------------|------------------|-------------------|--------------------|--------------|
| NCT04311177 | Losartan for patients with COVID-19 not requiring hospitalization                                                                     | Losartan                          | Placebo          | USA               | Recruiting         | April, 2021  |
| NCT04366050 | Ramipril for the Treatment of COVID-19 (RAMIC)                                                                                        | Ramipril                          | Placebo          | USA               | Not yet recruiting | April, 2021  |
| NCT04335786 | Valsartan for prevention of acute respiratory distress syndrome in hospitalized patients with SARS-COV-2 (COVID-19) infection disease | Valsartan                         | Placebo          | Netherlands       | Recruiting         | August, 2021 |
| NCT04343001 | Coronavirus response - active support for hospitalized COVID-19 patients (CRASH-19)                                                   | Aspirin, Losartan, Simvastatin    | Standard of care | Nigeria, Pakistan | Not yet recruiting | August, 2021 |
| NCT04353596 | Stopping ACE-inhibitors in COVID-19 (ACEI-COVID)                                                                                      | Stopping/replacing ACEIs and ARBs | No intervention  | Germany           | Recruiting         | May, 2022    |

Abbreviations: ACEIs, angiotensin-converting enzyme inhibitors; ARBs, angiotensin receptor blockers; COVID-19, coronavirus disease 2019; USA, united states of america.

**eTable 4. Newcastle-Ottawa scale for risk of bias assessment of cross-sectional studies**

| Study            | SELECTION          |             |                 |                               | COMPARABILITY | OUTCOME                   |                  | Total (maximum = 10) |
|------------------|--------------------|-------------|-----------------|-------------------------------|---------------|---------------------------|------------------|----------------------|
|                  | Representativeness | Sample size | Non-respondents | Ascertainment of the exposure |               | Assessment of the outcome | Statistical test |                      |
| Guo, 2020        | *                  | -           | *               | *                             | -             | **                        | -                | 5                    |
| Peng, 2020       | *                  | -           | *               | *                             | -             | **                        | -                | 5                    |
| Meng, 2020       | *                  | -           | *               | *                             | -             | **                        | -                | 5                    |
| Liu, 2020        | *                  | -           | *               | *                             | *             | **                        | *                | 7                    |
| Zeng, 2020       | *                  | -           | *               | *                             | -             | **                        | -                | 5                    |
| Yun, 2020        | *                  | -           | *               | *                             | -             | **                        | -                | 5                    |
| Li, 2020         | *                  | *           | *               | *                             | -             | **                        | -                | 6                    |
| Argenziano, 2020 | *                  | *           | *               | *                             | -             | **                        | -                | 6                    |
| Chen, 2020       | *                  | -           | *               | *                             | -             | **                        | -                | 5                    |
| Ashraf, 2020     | *                  | -           | *               | *                             | -             | **                        | -                | 5                    |
| Richardson, 2020 | *                  | *           | *               | *                             | -             | **                        | -                | 6                    |
| Ip, 2020         | *                  | *           | *               | *                             | -             | **                        | -                | 6                    |
| Tedeschi, 2020   | *                  | -           | *               | *                             | **            | **                        | *                | 8                    |
| Wang, 2020       | *                  | -           | *               | *                             | -             | **                        | -                | 5                    |
| Reynolds, 2020   | *                  | *           | *               | *                             | **            | **                        | *                | 9                    |
| Mancia, 2020     | *                  | *           | *               | *                             | -             | **                        | -                | 6                    |
| Jurado, 2020     | *                  | *           | *               | *                             | -             | **                        | -                | 6                    |
| Regina, 2020     | *                  | *           | *               | *                             | -             | **                        | -                | 6                    |
| Tan, 2020        | *                  | *           | *               | *                             | -             | **                        | -                | 6                    |

|                  |   |   |   |   |   |    |   |   |
|------------------|---|---|---|---|---|----|---|---|
| Zhou, 2020       | * | - | * | * | - | ** | - | 5 |
| Conversano, 2020 | * | * | * | * | - | ** | * | 7 |

**eTable 5. Newcastle-Ottawa scale for risk of bias assessment of case control studies**

| Study       | SELECTION                       |                                 |                       |                        | COMPARABILITY | EXPOSURE                  |                                                     |                   | Total (maximum = 9) |
|-------------|---------------------------------|---------------------------------|-----------------------|------------------------|---------------|---------------------------|-----------------------------------------------------|-------------------|---------------------|
|             | Is the case definition adequate | Representativeness of the cases | Selection of Controls | Definition of Controls |               | Ascertainment of exposure | Same method of ascertainment for cases and controls | Non-Response rate |                     |
| Bravi, 2020 | *                               | *                               | -                     | *                      | **            | *                         | *                                                   | *                 | 8                   |
| Yan, 2020   | *                               | *                               | *                     | *                      | **            | *                         | *                                                   | *                 | 9                   |



**eTable 6. Newcastle-Ottawa scale for risk of bias assessment of cohort studies**

| Study               | SELECTION                                |                                     |                               |                                  | COMPARABILITY | OUTCOME                   |                     |                       | Total (maximum = 9) |
|---------------------|------------------------------------------|-------------------------------------|-------------------------------|----------------------------------|---------------|---------------------------|---------------------|-----------------------|---------------------|
|                     | Representativeness of the exposed cohort | Selection of the non-exposed cohort | Ascertainment of the exposure | Outcome status at start of study |               | Assessment of the outcome | Length of follow-up | Adequacy of follow-up |                     |
| Bean, 2020          | *                                        | *                                   | *                             | *                                | -             | *                         | *                   | *                     | 7                   |
| Feng, 2020          | *                                        | *                                   | *                             | *                                | -             | *                         | *                   | *                     | 7                   |
| Zhang, 2020         | *                                        | *                                   | *                             | *                                | **            | *                         | *                   | *                     | 9                   |
| Giorgi, 2020        | *                                        | *                                   | *                             | *                                | *             | *                         | *                   | *                     | 8                   |
| Benelli, 2020       | *                                        | *                                   | *                             | *                                | -             | *                         | *                   | *                     | 7                   |
| Lee, 2020           | *                                        | *                                   | *                             | *                                | **            | *                         | *                   | *                     | 9                   |
| Yang, 2020          | *                                        | *                                   | *                             | *                                | -             | *                         | *                   | *                     | 7                   |
| Rentsch, 2020       | *                                        | *                                   | *                             | *                                | **            | *                         | *                   | *                     | 9                   |
| Baker, 2020         | *                                        | *                                   | *                             | *                                | -             | *                         | *                   | *                     | 7                   |
| De Spiegeleer, 2020 | *                                        | *                                   | *                             | *                                | **            | *                         | *                   | *                     | 9                   |
| Huang, 2020         | *                                        | *                                   | *                             | *                                | -             | *                         | *                   | *                     | 7                   |
| Jung, 2020          | *                                        | *                                   | *                             | *                                | **            | *                         | *                   | *                     | 9                   |
| Khera, 2020         | *                                        | *                                   | *                             | *                                | **            | *                         | *                   | *                     | 9                   |
| Kim, 2020           | *                                        | *                                   | *                             | *                                | **            | *                         | *                   | *                     | 9                   |
| Rhee, 2020          | *                                        | *                                   | *                             | *                                | **            | *                         | *                   | *                     | 9                   |
| Yuchen, 2020        | *                                        | *                                   | *                             | *                                | -             | *                         | *                   | *                     | 7                   |
| Mehta, 2020         | *                                        | *                                   | *                             | *                                | -             | *                         | *                   | *                     | 7                   |

**eTable 7. Adjusted effect measures of association between ACEIs/ARBs use and clinical outcomes in COVID-19 patients**

| Study               | Outcome                          | Exposure      | Effect measures (95% CI) | P-value | Adjusted variables                                                                                                                        |
|---------------------|----------------------------------|---------------|--------------------------|---------|-------------------------------------------------------------------------------------------------------------------------------------------|
| Zhang, 2020         | All-cause mortality              | ACEIs or ARBs | aHR: 0.42 (0.19-0.92)    | 0.03    | Age, sex, diabetes, CAD, stroke, CKD, and in-hospital medications                                                                         |
| Giorgi, 2020        | All-cause mortality              | ACEI          | aHR: 0.97 (0.69-1.34)    | NR      | Age, sex, and Charlson comorbidity index                                                                                                  |
|                     |                                  | ARB           | aHR: 1.16 (0.83-1.64)    | NR      |                                                                                                                                           |
|                     | Hospitalization                  | ACEI          | aHR: 1.30 (1.10-1.50)    | NR      |                                                                                                                                           |
|                     |                                  | ARB           | aHR: 1.20 (1.00-1.50)    | NR      |                                                                                                                                           |
| Lee, 2020           | All-cause mortality              | ACEIs or ARBs | aHR: 1.06 (0.67-1.66)    | 0.81    | Age, sex, hypertension, diabetes, CAD, HF, stroke, CKD, and COPD                                                                          |
|                     |                                  | ACEI          | aHR: 0.72 (0.17-3.03)    | 0.65    |                                                                                                                                           |
|                     |                                  | ARB           | aHR: 1.09 (0.69-1.69)    | 0.71    |                                                                                                                                           |
| Feng, 2020          | COVID-19 severity                | ACEIs or ARBs | aOR: 0.41 (0.05-3.19)    | 0.39    | Age, sex, diabetes, and CVD                                                                                                               |
| Bean, 2020          | COVID-19 severity                | ACEI          | aOR: 0.29 (0.10-0.75)    | <0.01   | Age, sex, diabetes mellitus, CAD, and HF                                                                                                  |
| Rentsch, 2020       | Hospitalization                  | ACEIs or ARBs | aOR: 1.15 (0.71-1.87)    | NR      | Age, CKD, COPD, diabetes, hypertension, vascular disease, oxygen saturation, temperature, albumin, eGFR, FIB-4, WBC, and lymphocyte count |
|                     | ICU admission                    | ACEIs or ARBs | aOR: 1.66 (0.94-2.93)    | NR      |                                                                                                                                           |
| Liu, 2020           | COVID-19 severity (in >65 years) | ARB           | aOR: 0.25 (0.06-0.98)    | 0.04    | Sex                                                                                                                                       |
| Yan, 2020           | COVID-19 severity                | ACEI          | aOR: 1.23 (0.19-7.93)    | 0.83    | Age, sex, and BMI                                                                                                                         |
|                     |                                  | ARB           | aOR: 0.77 (0.36-1.63)    | 0.49    |                                                                                                                                           |
| Tedeschi, 2020      | All-cause mortality              | ACEIs or ARBs | aHR: 0.97 (0.68-1.39)    | 0.88    | Age, sex, CVD, and COPD                                                                                                                   |
| Reynolds, 2020      | COVID-19 severity                | ACEI          | aOR: 0.90 (0.70-1.14)    | 0.37    | Age, sex, and comorbidities                                                                                                               |
|                     |                                  | ARB           | aOR: 0.99 (0.79-1.25)    | 0.95    |                                                                                                                                           |
| Bravi, 2020         | COVID-19 severity                | ACEIs or ARBs | aOR: 0.58 (0.34-1.01)    | 0.05    | Age, sex, diabetes, CVD, COPD, cancer, and CKD                                                                                            |
|                     |                                  | ACEI          | aOR: 0.70 (0.44-1.13)    | 0.15    |                                                                                                                                           |
|                     |                                  | ARB           | aOR: 0.91 (0.56-1.47)    | 0.70    |                                                                                                                                           |
| De Spiegeleer, 2020 | COVID-19 severity                | ACEIs or ARBs | aOR: 0.48 (0.10-1.97)    | 0.31    | Age, sex, functional status, hypertension, and diabetes                                                                                   |
| Jung, 2020          | All-cause mortality              | ACEIs or ARBs | aOR: 0.88 (0.53-1.44)    | 0.60    | Age, sex, Charlson comorbidity index, immunosuppression, and hospital type                                                                |

|             |                     |               |                       |      |                                                                                                                            |
|-------------|---------------------|---------------|-----------------------|------|----------------------------------------------------------------------------------------------------------------------------|
| Khera, 2020 | All-cause mortality | ACEI          | aHR: 0.97 (0.81-1.16) | 0.74 | Age, sex, race, insurance type, diabetes, CAD, HF, CKD, Charlson comorbidity index, and number of anti-hypertensive agents |
|             |                     | ARB           | aHR: 1.15 (0.95-1.38) | 0.15 | Age, sex, race, insurance type, diabetes, CAD, HF, CKD, Charlson comorbidity index, and number of anti-hypertensive agents |
|             | Hospitalization     | ACEI          | aHR: 0.77 (0.53-1.13) | 0.68 | Age, sex, race, insurance type, diabetes, CAD, HF, CKD, Charlson comorbidity index, and number of anti-hypertensive agents |
|             |                     | ARB           | aHR: 0.87 (0.61-1.25) | 0.68 | Age, sex, race, insurance type, diabetes, CAD, HF, CKD, Charlson comorbidity index, and number of anti-hypertensive agents |
| Kim, 2020   | ICU admission       | ARB           | aRR: 1.07 (0.65-1.21) | NR   | Age, sex, race, smoking, hypertension, obesity, diabetes, COPD, CVD, CKD, and immunosuppression                            |
| Rhee, 2020  | COVID-19 severity   | ACEIs or ARBs | aOR: 0.59 (0.25-1.43) | NR   | Age, sex, comorbidity, and medications                                                                                     |

Abbreviations: ACEIs, angiotensin-converting enzyme inhibitors; ARBs, angiotensin receptor blockers; NR, not reported; COVID-19, coronavirus disease 2019; aOR, adjusted odds ratio; aRR, adjusted risk ratio; aHR, adjusted hazard ratio; IC, interval confidence; ICU, intensive care unit; CAD, coronary artery disease; HF, heart failure; CKD, chronic kidney disease; CVD, cardiovascular disease; COPD, chronic obstructive pulmonary disease; eGFR, estimated glomerular filtration rate; FIB-4, fibrosis-4; WBC, white blood cell; BMI, body mass index; qSOFA, quick sepsis related organ failure assessment.

**eTable 8. Sensitivity analysis: random-effects meta-analysis with the Hartung-Knapp adjustment**

| Outcome                   | Exposure                        | Number of studies | Effect measure (95%CI)   | P-value |
|---------------------------|---------------------------------|-------------------|--------------------------|---------|
| All-cause mortality       | ACEIs or ARBs                   | 22                | OR: 1.11 (0.76-1.63)     | 0.57    |
|                           | ACEIs or ARBs (cross-sectional) | 11                | OR: 0.86 (0.62-1.20)     | 0.34    |
|                           | ACEIs or ARBs (cohort)          | 11                | OR: 1.30 (0.65-2.59)     | 0.42    |
|                           | ACEIs or ARBs (adjusted)        | 3                 | aHR: 0.83 (0.27-2.57)    | 0.54    |
|                           | ACEI                            | 7                 | OR: 1.18 (0.77-1.81)     | 0.39    |
|                           | ACEI (adjusted)                 | 3                 | aHR: 0.97 (0.88-1.07)    | 0.27    |
|                           | ARB                             | 6                 | OR: 1.79 (0.91-3.52)     | 0.08    |
|                           | ARB (adjusted)                  | 3                 | aHR: 1.14 (1.08-1.21)    | <0.01   |
| COVID-19 severity         | ACEIs or ARBs                   | 18                | OR: 0.79 (0.57-1.09)     | 0.15    |
|                           | ACEIs or ARBs (cross-sectional) | 11                | OR: 0.89 (0.54-1.48)     | 0.63    |
|                           | ACEIs or ARBs (case-control)    | 2                 | OR: 0.70 (0.57-1.09)     | 0.45    |
|                           | ACEIs or ARBs (cohort)          | 5                 | OR: 0.61 (0.37-1.00)     | 0.05    |
|                           | ACEIs or ARBs (adjusted)        | 4                 | aOR: 0.56 (0.48-0.66)    | <0.01   |
|                           | ACEI                            | 8                 | OR: 1.10 (0.48-2.51)     | 0.80    |
|                           | ACEI (adjusted)                 | 3                 | aOR: 0.66 (0.18-2.36)    | 0.29    |
|                           | ARB                             | 8                 | OR: 1.00 (0.73-1.37)     | 0.98    |
| Hospital discharge        | ARB (adjusted)                  | 2                 | aOR: 0.97 (0.64-1.48)    | 0.58    |
|                           | ACEIs or ARBs                   | 3                 | OR: 2.27 (0.35-14.90)    | 0.20    |
| Hospitalization           | ACEIs or ARBs                   | 4                 | OR: 1.83 (0.63-5.29)     | 0.17    |
|                           | ACEI                            | 4                 | OR: 1.63 (0.67-3.98)     | 0.18    |
|                           | ARB                             | 4                 | OR: 1.48 (0.72-3.05)     | 0.18    |
| ICU admission             | ACEIs or ARBs                   | 6                 | OR: 1.45 (1.10-1.93)     | 0.02    |
|                           | ACEI                            | 5                 | OR: 1.16 (0.60-2.26)     | 0.57    |
|                           | ARB                             | 5                 | OR: 1.26 (0.74-2.14)     | 0.30    |
| Mechanical ventilation    | ACEIs or ARBs                   | 7                 | OR: 1.39 (0.91-2.10)     | 0.11    |
| Length of hospital stay   | ACEIs or ARBs                   | 5                 | MD: -0.96 (-2.83-0.90)   | 0.23    |
| Troponin (µg/L)           | ACEIs or ARBs                   | 4                 | MD: -0.01 (-0.06-0.03)   | 0.44    |
| Creatinine (µmol/L)       | ACEIs or ARBs                   | 6                 | MD: -0.58 (-11.25-10.10) | 0.89    |
| Procalcitonin (ng/mL)     | ACEIs or ARBs                   | 5                 | MD: -0.02 (-0.06-0.02)   | 0.28    |
| C-reactive protein (mg/L) | ACEIs or ARBs                   | 5                 | MD: -6.39 (-21.70-8.92)  | 0.31    |
| Interleukin-6 (pg/mL)     | ACEIs or ARBs                   | 4                 | MD: -4.41 (-22.04-13.21) | 0.48    |
| D-dimer (nmol/L)          | ACEIs or ARBs                   | 6                 | MD: -0.91 (-3.34-1.52)   | 0.38    |

Abbreviations: 95%CI, 95% confidence interval; OR, odds ratio; aHR, adjusted hazard ratio; aOR, adjusted odds ratio; MD, mean difference; ACEIs, angiotensin-converting enzyme inhibitors; ARBs, angiotensin receptor blockers; COVID-19, coronavirus disease 2019; ICU, intensive care unit.

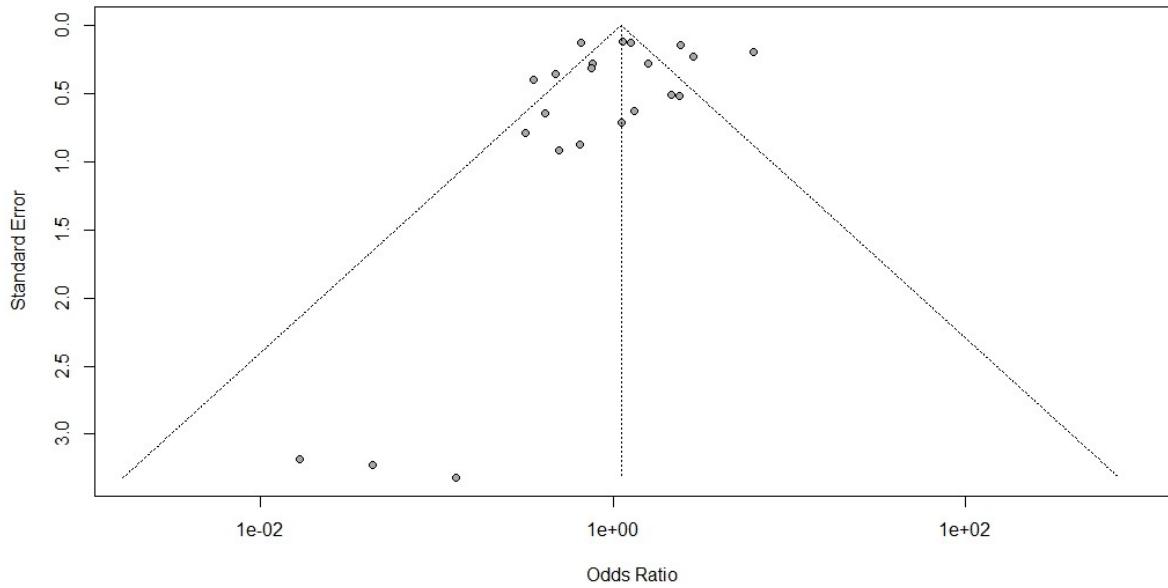

**eFigure 1. Funnel plot of all-cause mortality in COVID-19 patients**

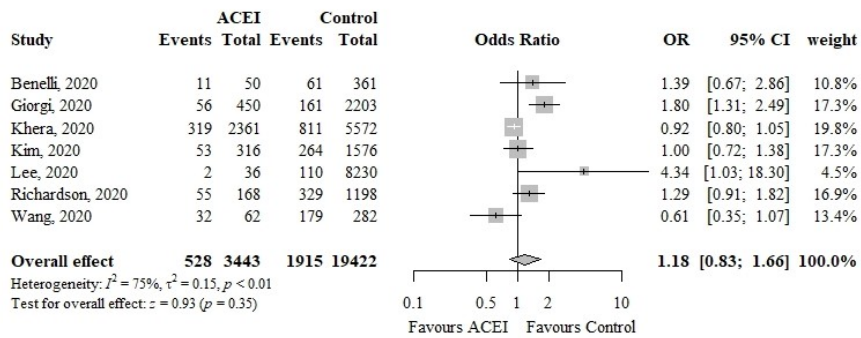

**eFigure 2. Forest plot showing the association between ACEI use and all-cause mortality in COVID-19 patients**

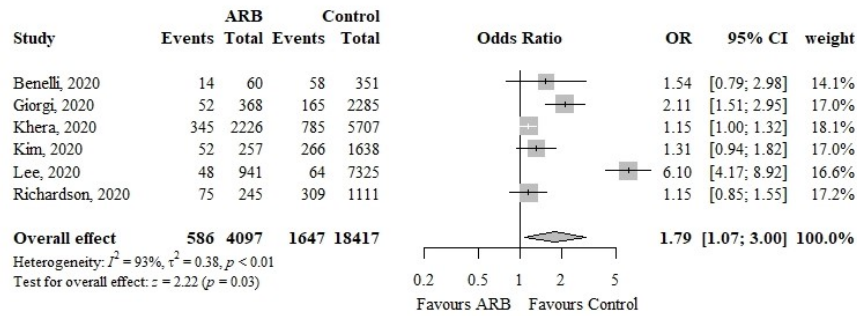

**eFigure 3. Forest plot showing the association between ARB use and all-cause mortality in COVID-19 patients**

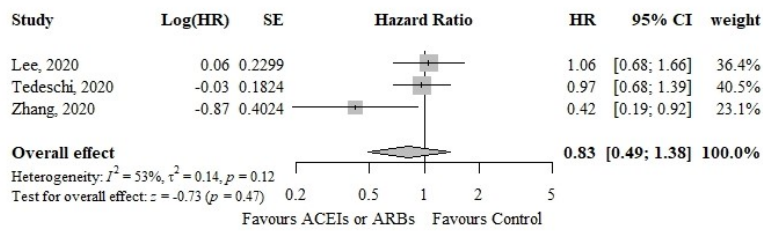

**eFigure 4. Forest plot showing the association between ACEIs or ARBs use and all-cause mortality in COVID-19 patients (adjusted estimates)**

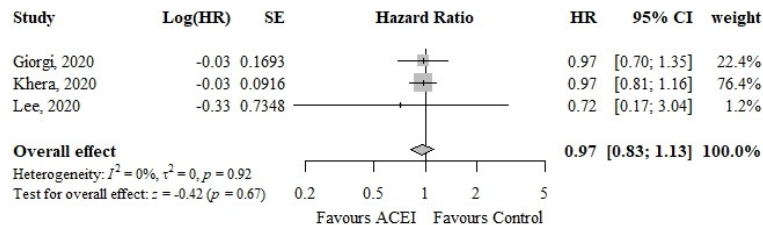

**eFigure 5. Forest plot showing the association between ACEI use and all-cause mortality in COVID-19 patients (adjusted estimates)**

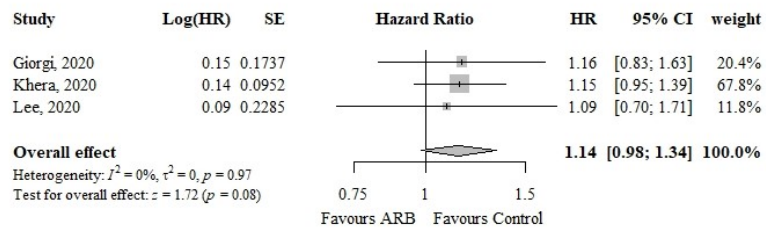

**eFigure 6. Forest plot showing the association between ARB use and all-cause mortality in COVID-19 patients (adjusted estimates)**

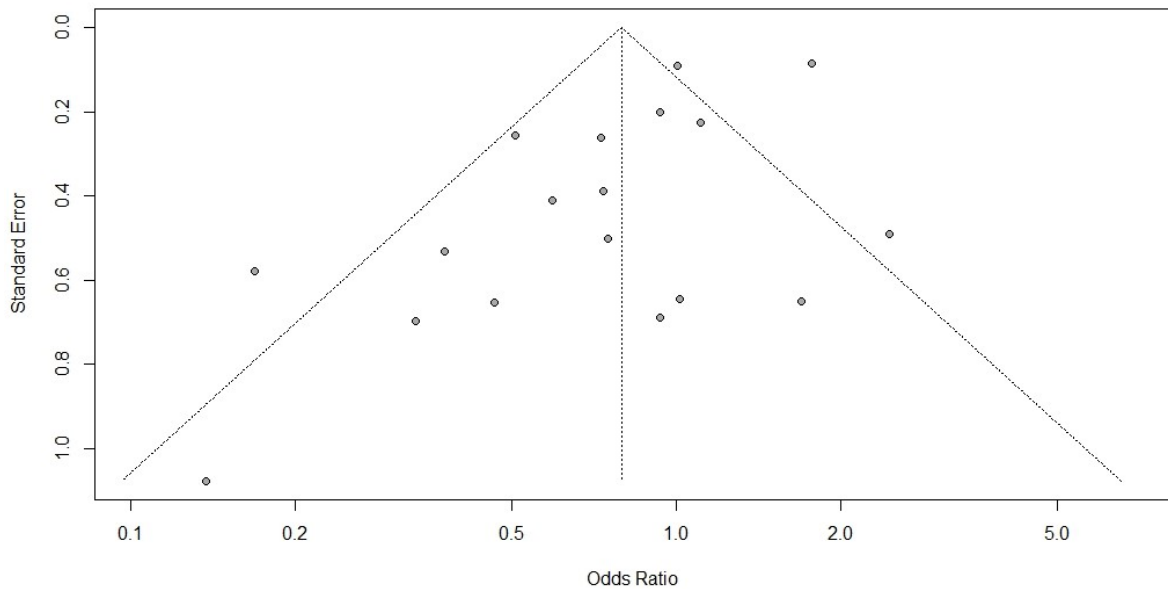

**eFigure 7. Funnel plot of COVID-19 severity**

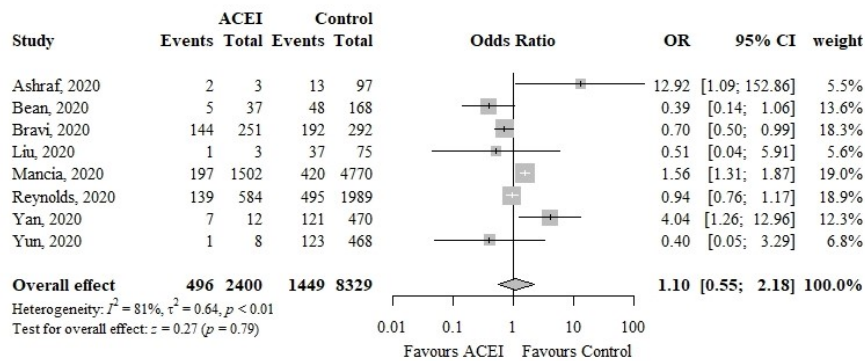

**eFigure 8. Forest plot showing the association between ACEI use and COVID-19 severity**

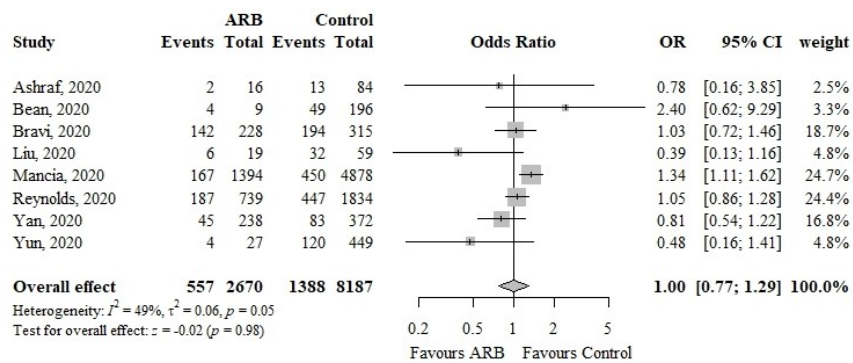

**eFigure 9. Forest plot showing the association between ARB use and COVID-19 severity**

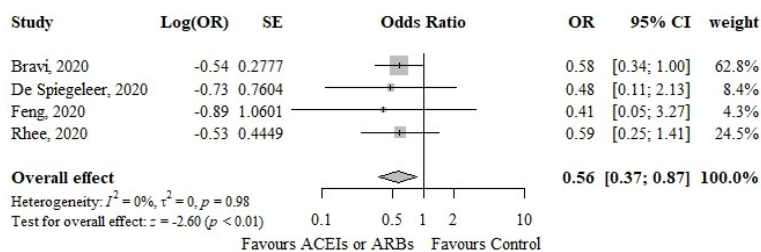

**eFigure 10. Forest plot showing the association between ACEIs or ARBs use and COVID-19 severity (adjusted estimates)**



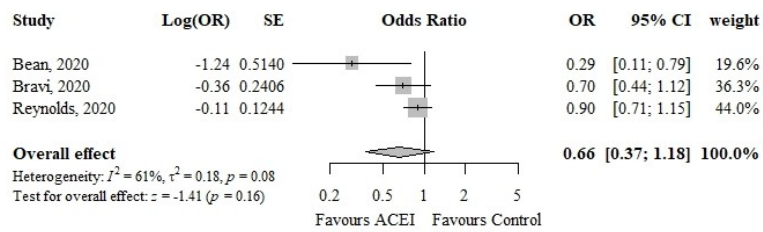

**eFigure 11. Forest plot showing the association between ACEI use and COVID-19 severity (adjusted estimates)**

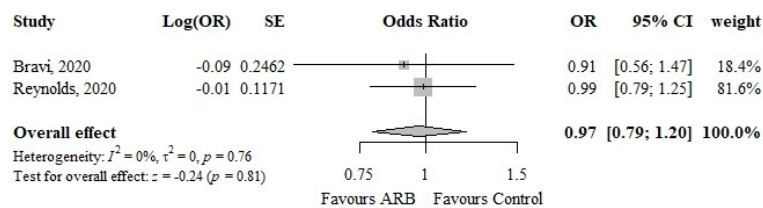

**eFigure 12. Forest plot showing the association between ARB use and COVID-19 severity (adjusted estimates)**

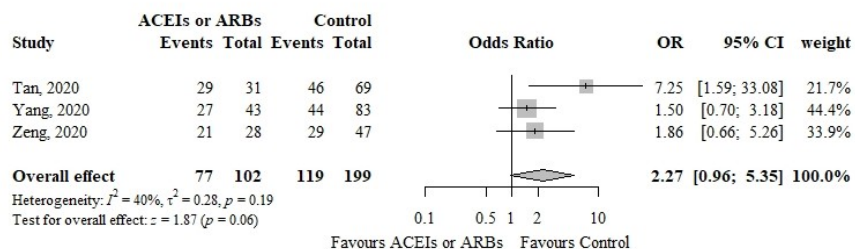

**eFigure 13. Forest plot showing the association between ACEIs or ARBs use and hospital discharge in COVID-19 patients**

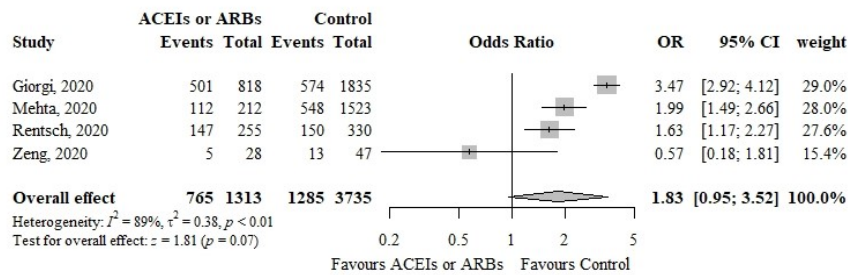

**eFigure 14. Forest plot showing the association between ACEIs or ARBs use and hospitalization in COVID-19 patients**

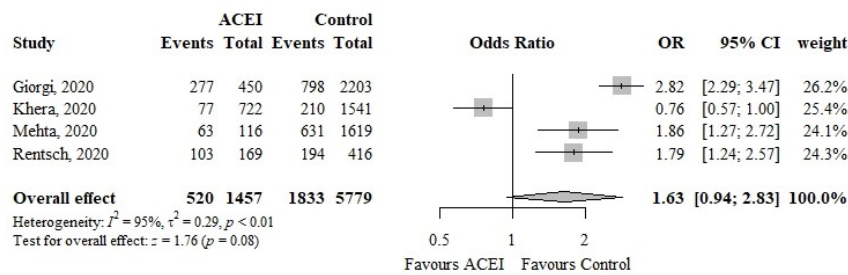

**eFigure 15. Forest plot showing the association between ACEI use and hospitalization in COVID-19 patients**

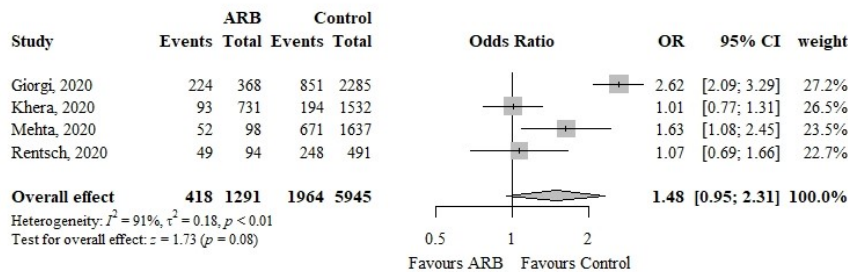

**eFigure 16. Forest plot showing the association between ARB use and hospitalization in COVID-19 patients**

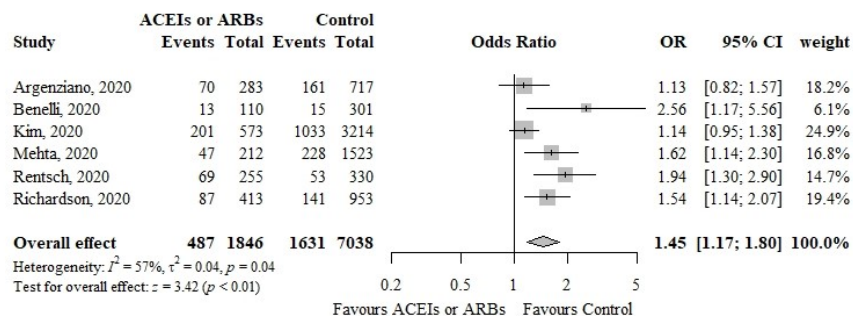

**eFigure 17. Forest plot showing the association between ACEIs or ARBs use and ICU admission in COVID-19 patients**

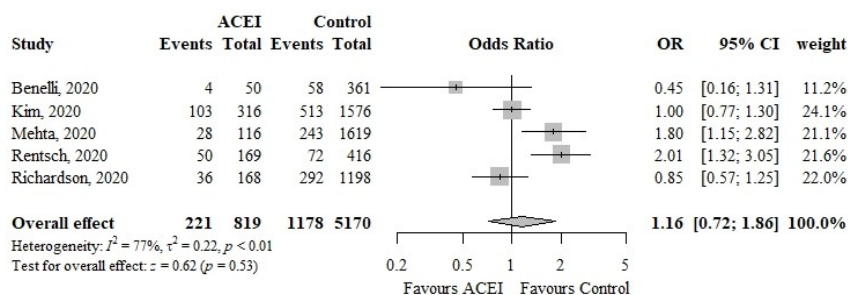

**eFigure 18. Forest plot showing the association between ACEI use and ICU admission in COVID-19 patients**

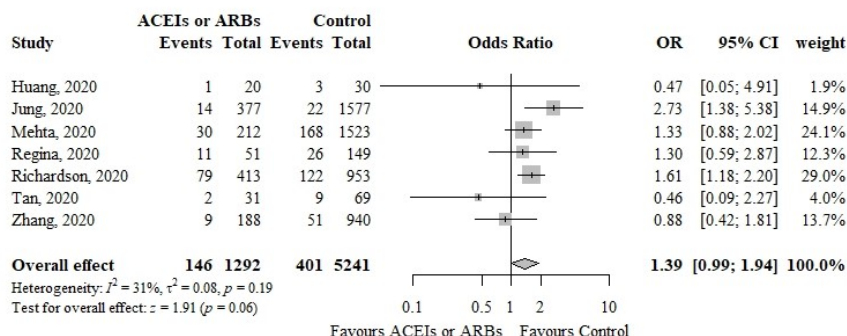

**eFigure 19. Forest plot showing the association between ARB use and ICU admission in COVID-19 patients**

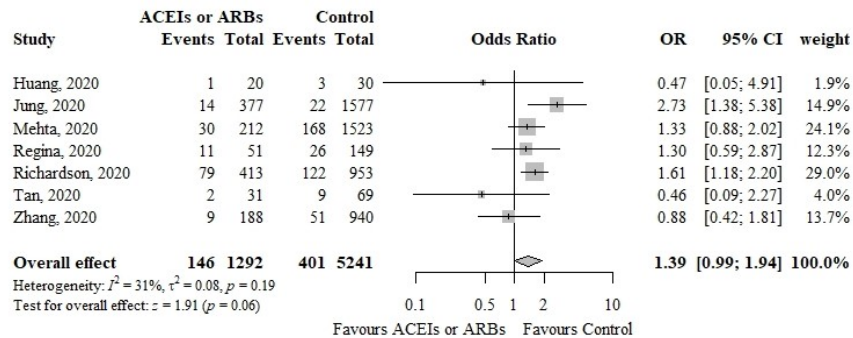

**eFigure 20. Forest plot showing the association between ACEIs or ARBs use and mechanical ventilation in COVID-19 patients**

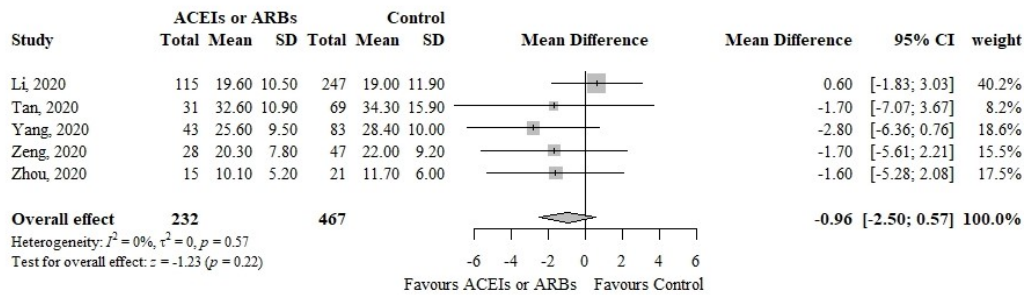

**eFigure 21. Forest plot showing the association between ACEIs or ARBs use and length of hospital stay in COVID-19 patients**

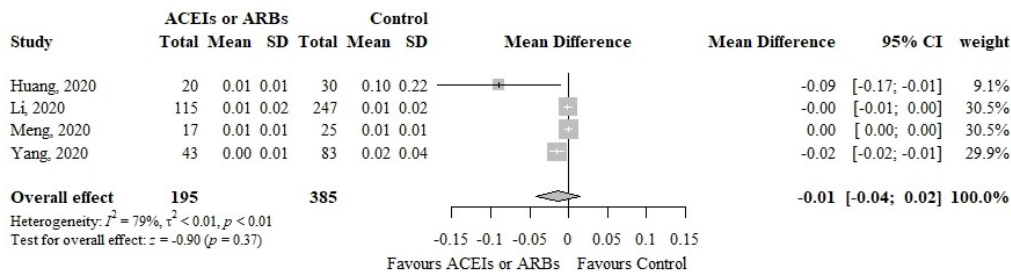

**eFigure 22. Forest plot showing the association between ACEIs or ARBs use and troponin level in COVID-19 patients**

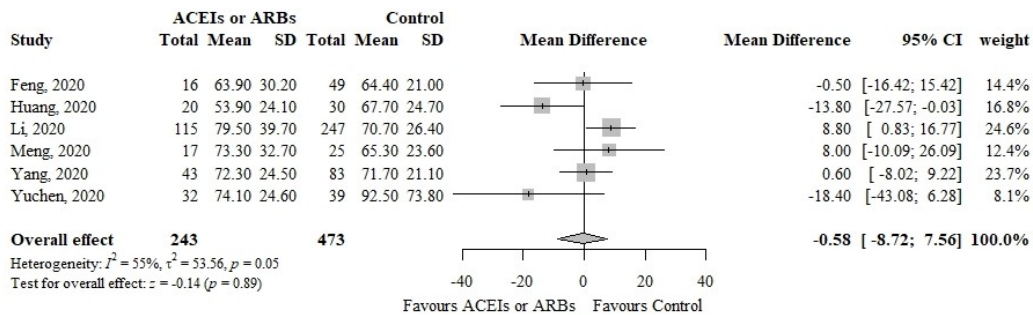

**eFigure 23. Forest plot showing the association between ACEIs or ARBs use and creatinine level in COVID-19 patients**

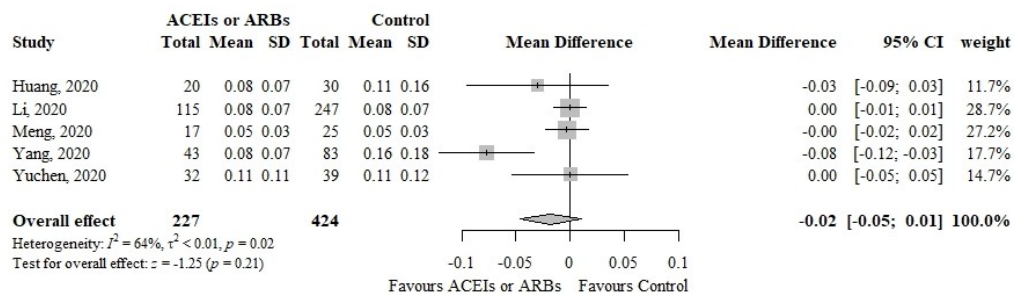

**eFigure 24. Forest plot showing the association between ACEIs or ARBs use and procalcitonin level in COVID-19 patients**

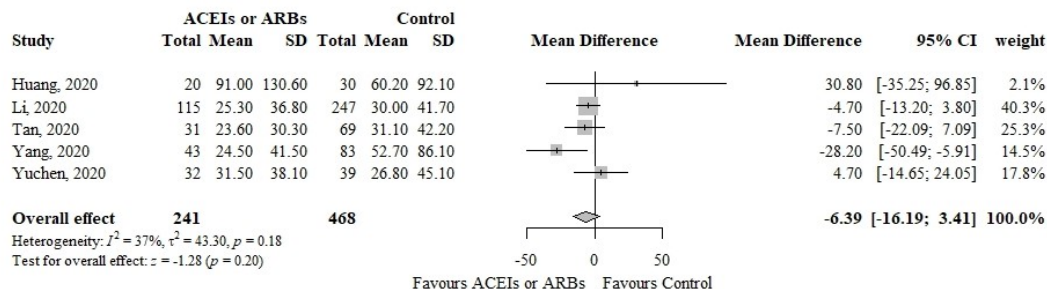

**eFigure 25. Forest plot showing the association between ACEIs or ARBs use and CRP level in COVID-19 patients**

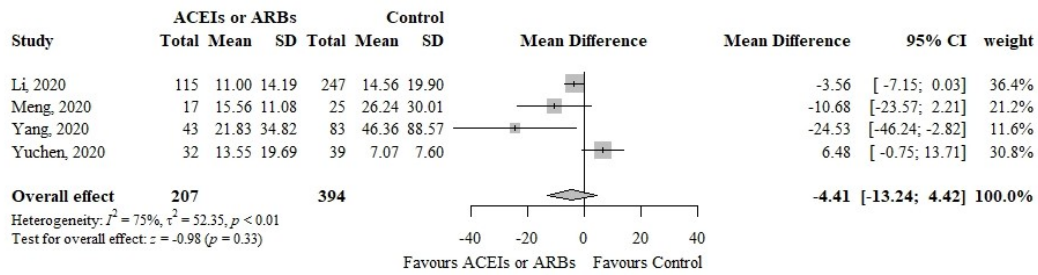

**eFigure 26. Forest plot showing the association between ACEIs or ARBs use and IL-6 level in COVID-19 patients**

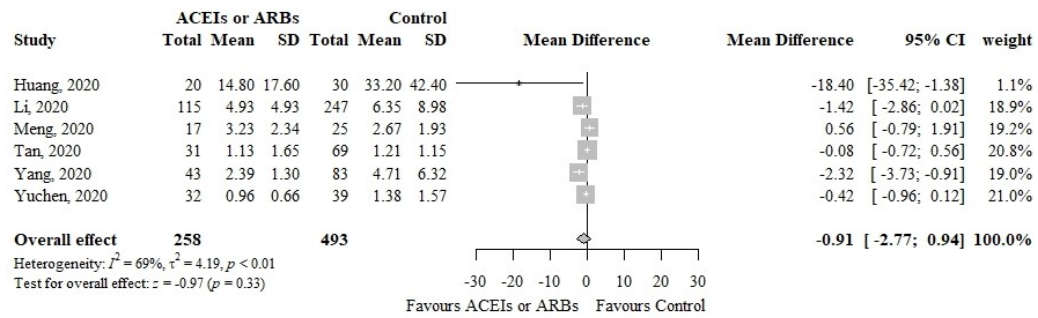

**eFigure 27. Forest plot showing the association between ACEIs or ARBs use and D-dimer level in COVID-19 patients**
